# Supplementary material for: miRNA Profiling of Naïve, Effector and Memory CD8 T Cells
Source: PLoS One. 2007 Oct 10;2(10):e1020. doi: 10.1371/journal.pone.0001020 (PMC2000354; doi:10.1371/journal.pone.0001020)
Supplement: Table S1 — miRNAs cloned from naïve, effector and memory T cells. The cloning frequency of individual microRNAs and their representation as a percentage of total miRNA clones isolated in each T cell subset are shown. (0.02 MB XLS) [file pone.0001020.s002.xls]

## Sheet: Sheet1
Table S1
	reads			percent of total miRNA pool
	Naïve	Effector	Memory	Naïve	Effector	Memory
miR-21	14	75	46	4.1	31.3	18.1
miR-16	58	23	36	16.9	9.6	14.2
miR-142-3p	60	21	33	17.5	8.8	13
miR-150	30		6	8.7	0	2.4
miR-142-5p	21	4	9	6.1	1.7	3.5
miR-15b	9	3	12	2.6	1.3	4.7
let-7f	13	7	4	3.8	2.9	1.6
miR-19b	6	9	4	1.7	3.8	1.6
miR-29a	8	3	7	2.3	1.3	2.8
miR-26a	8	1	6	2.3	0.4	2.4
miR-20a	5	4	4	1.5	1.7	1.6
miR-23a	2	6	5	0.6	2.5	2
let-7a	5	4	4	1.5	1.7	1.6
miR-18	1	8	3	0.3	3.3	1.2
let-7g	6	2	3	1.7	0.8	1.2
miR-24	2	3	5	0.6	1.3	2
miR-15a	4	3	2	1.2	1.3	0.8
miR-92	4	4		1.2	1.7	0
miR-103	4	3	1	1.2	1.3	0.4
miR-17-5p	1	2	4	0.3	0.8	1.6
miR-155	3	2	2	0.9	0.8	0.8
miR-27a	1	4	2	0.3	1.7	0.8
miR-27b	1	6		0.3	2.5	0
let-7i	3		4	0.9	0	1.6
miR-146	2	1	3	0.6	0.4	1.2
miR-342	5	1		1.5	0.4	0
miR-101b	5		1	1.5	0	0.4
miR-19a	1	4	1	0.3	1.7	0.4
miR-30d	3		3	0.9	0	1.2
let-7c	4	1	1	1.2	0.4	0.4
miR-93	1	2	2	0.3	0.8	0.8
miR-106a	1	1	3	0.3	0.4	1.2
miR-106b	1	2	2	0.3	0.8	0.8
miR-23b		1	4	0	0.4	1.6
miR-26b	2	1	2	0.6	0.4	0.8
miR-29b	4	1		1.2	0.4	0
miR-30b	4		1	1.2	0	0.4
miR-30c	4	1		1.2	0.4	0
let-7d		1	4	0	0.4	1.6
miR-31		2	2	0	0.8	0.8
miR-147		3	1	0	1.3	0.4
miR-148a		4		0	1.7	0
miR-20b	1	1	2	0.3	0.4	0.8
miR-7	1	1	1	0.3	0.4	0.4
miR-191	1		2	0.3	0	0.8
miR-221	2		1	0.6	0	0.4
miR-484	1	2		0.3	0.8	0
miR-25	2			0.6	0	0
miR-33	1	1		0.3	0.4	0
miR-140		1	1	0	0.4	0.4
miR-182		2		0	0.8	0
miR-185	1	1		0.3	0.4	0
miR-223	2			0.6	0	0
miR-301	1		1	0.3	0	0.4
miR-423		1	1	0	0.4	0.4
miR-101a	2			0.6	0	0
miR-130b			2	0	0	0.8
miR-146b			2	0	0	0.8
miR-30e	2			0.6	0	0
miR-17-3p	1			0.3	0	0
miR-22		1		0	0.4	0
miR-22*		2		0	0.8
miR-138	1			0.3	0	0
miR-141	1			0.3	0	0
miR-183			1	0	0	0.4
miR-211	1			0.3	0	0
miR-219	1			0.3	0	0
miR-222	1			0.3	0	0
miR-297	1			0.3	0	0
miR-337	1			0.3	0	0
miR-345			1	0	0	0.4
miR-431		1		0	0.4	0
miR-466a-3p	1			0.3	0	0
miR-466a-5p	1			0.3	0
miR-501		1		0	0.4	0
miR-652			1	0	0	0.4
miR-674	1			0.3	0	0
miR-690	1			0.3	0	0
miR-10a	1			0.3	0	0
miR-125a	1			0.3	0	0
miR-128a	1			0.3	0	0
miR-140*			1	0	0	0.4
miR-181a	1			0.3	0	0
miR-181b			1	0	0	0.4
miR-181c	1			0.3	0	0
miR-181b*			1	0	0	0.4
miR-200b	1			0.3	0	0
miR-200c		1		0	0.4	0
miR-29c			1	0	0	0.4
miR-324-5p	1			0.3	0	0
miR-34a		1		0	0.4	0
miR-669a			1	0	0	0.4
let-7b	1			0.3	0	0
let-7d*			1	0	0	0.4
pool	343	240	254
