# Supplementary material for: miRNA Profiling of Naïve, Effector and Memory CD8 T Cells
Source: PLoS One. 2007 Oct 10;2(10):e1020. doi: 10.1371/journal.pone.0001020 (PMC2000354; doi:10.1371/journal.pone.0001020)
Supplement: Table S3 — Normalized miRNA cloning frequency in T cell subsets. The percent cloning frequency in Supplemental Table 1 was normalized according to total hybridization signal obtained in the microarray for the corresponding T cell subset to obtain the normalized expression data. Only miRNAs cloned more than 4 times are shown. (0.02 MB XLS) [file pone.0001020.s004.xls]

## Sheet: Sheet1
Table S3
	normalized
	naïve	effector	memory
miR-21	4.1	10.5	12.5
miR-16	16.9	3.2	9.8
miR-142-3p	17.5	2.9	9
miR-150	8.7	0	1.6
miR-142-5p	6.1	0.6	2.4
miR-15b	2.6	0.4	3.3
let-7f	3.8	1	1.1
miR-19b	1.7	1.3	1.1
miR-29a	2.3	0.4	1.9
miR-26a	2.3	0.1	1.6
miR-20a	1.5	0.6	1.1
miR-23a	0.6	0.8	1.4
let-7a	1.5	0.6	1.1
miR-18	0.3	1.1	0.8
let-7g	1.7	0.3	0.8
miR-24	0.6	0.4	1.4
miR-15a	1.2	0.4	0.5
miR-92	1.2	0.6	0
miR-103	1.2	0.4	0.3
miR-17-5p	0.3	0.3	1.1
miR-155	0.9	0.3	0.5
miR-27a	0.3	0.6	0.5
miR-27b	0.3	0.8	0
let-7i	0.9	0	1.1
miR-146	0.6	0.1	0.8
miR-342	1.5	0.1	0
miR-101b	1.5	0	0.3
miR-19a	0.3	0.6	0.3
miR-30d	0.9	0	0.8
let-7c	1.2	0.1	0.3
miR-93	0.3	0.3	0.5
miR-106a	0.3	0.1	0.8
miR-106b	0.3	0.3	0.5
miR-23b	0	0.1	1.1
miR-26b	0.6	0.1	0.5
miR-29b	1.2	0.1	0
miR-30b	1.2	0	0.3
miR-30c	1.2	0.1	0
let-7d	0	0.1	1.1
miR-31	0	0.3	0.5
miR-147	0	0.4	0.3
miR-148a	0	0.6	0
