# Supplementary material for: miRNA Profiling of Naïve, Effector and Memory CD8 T Cells
Source: PLoS One. 2007 Oct 10;2(10):e1020. doi: 10.1371/journal.pone.0001020 (PMC2000354; doi:10.1371/journal.pone.0001020)
Supplement: Table S5 — Primers used for the 3′RACE-based real time PCR. (0.01 MB XLS) [file pone.0001020.s006.xls]

## Sheet: Sheet1
Table S5
mir-16	TAGCAGCACGTAAATATTGGC
mir-21	TAGCTTATCAGACTGATGTTG
mir-150	TCTCCCAACCCTTGTACCAG
miR-18	AAGGTGCATCTAGTGCAGA
mir-142-3p	GTAGTGTTTCCTACTTTATG
mir-142-5p	CATAAAGTAGAAAGCACTACT
mir-31	GGCAAGATGCTGGCATAGC
mir-103	GCAGCATTGTACAGGGCTAT
mir-146	GAGAACTGAATTCCATGGGT
miR-155	TAATGCTAATTGTGATAGG
mir-221	GCTACATTGTCTGCTGGGT
mir-342	CTCACACAGAAATCGCACCCG
mir-101b	TACAGTACTGTGATAGCT
mir-148a	CAGTGCACTACAGAACTTTG
mir-15a	GCAGCACATAATGGTTTGTG
mir-15b	GCAGCACATCATGGTTTAC
mir-23a	ATCACATTGCCAGGGATTTC
mir-23b	ATCACATTGCCAGGGATTAC
mir-26a	CAAGTAATCCAGGATAGGC
mir-92	ATTGCACTTGTCCCGGCC
miR 147	GTGTGCGGAAATGCTTCTGC
miR-669d	ACTTGTGTGTGCATGTATAT
miR-466-5p	TATGTGTGTGTACATGTAC
miR-22-5p	AGTTCTTCAGTGGCAAGCTT
mir-181b*	CTCACTGAACAATGAATGC
Reverse primer	GCGAGCACAGAATTAATACGAC
miR RT oligo dT	GCGAGCACAGAATTAATACGACTCACTATAGGT(20)VN
